# Supplementary material for: Methylammonium, formamidinium and ethylenediamine mixed triple-cation perovskite solar cells with high efficiency and remarkable stability
Source: Royal Society of Chemistry journal article supplement (doi:10.1039/c8ta05756g), 2018-01-01
Supplement: c8ta05756g1.pdf [file c8ta05756g1.pdf]

**Methylammonium, formamidinium and ethylenediamine mixed triple-cation  
perovskite solar cells with high efficiency and remarkable stability**

Zhiliang Chen,<sup>ab</sup> Xiaolu Zheng,<sup>a</sup> Fang Yao,<sup>a</sup> Junjie Ma,<sup>a</sup> Chen Tao,<sup>a\*</sup> and Guojia  
Fang,<sup>ab\*</sup>

<sup>a</sup>*School of Physics and Technology, Wuhan University, Wuhan 430072, People's  
Republic of China.*

<sup>b</sup>*Shenzhen Institute, Wuhan University, Shenzhen 518055, People's Republic of China.*

*E-mail:* gjfang@whu.edu.cn

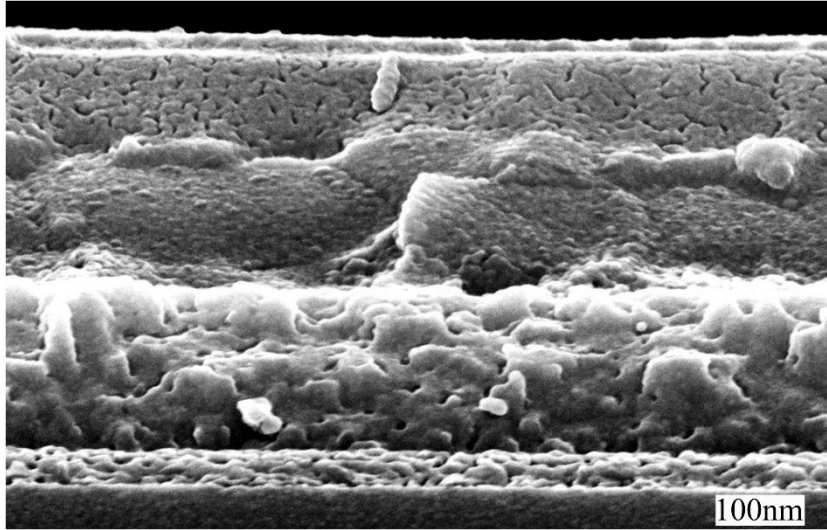

**Fig. S1.** Cross-sectional SEM image of the PSCs used in the present work.

**Table S1.** Fitted parameters of TRPL curves for the perovskite films deposited on FTO substrates.

| Sample | $\tau_1$<br>[ns] | $B_1$  | $\tau_2$<br>[ns] | $B_2$  | $\tau_{\text{avg}}$<br>[ns] |
|--------|------------------|--------|------------------|--------|-----------------------------|
| 0.0%   | 18.18            | 37.7%  | 53.80            | 62.3%  | 30.94                       |
| 0.5%   | 18.94            | 37.28% | 85.22            | 62.72% | 36.98                       |
| 1.0%   | 19.86            | 38.16% | 89.06            | 61.84% | 38.24                       |
| 1.5%   | 21.55            | 33.79% | 105.30           | 66.21% | 45.52                       |
| 2.0%   | 12.48            | 52.02% | 69.55            | 47.98% | 20.58                       |
| 4.0%   | 8.15             | 57.12% | 43.74            | 42.88% | 12.52                       |
| 6.0%   | 7.50             | 59.37% | 46.60            | 40.63% | 11.38                       |
| 8.0%   | 6.51             | 63.8%  | 41.36            | 36.2%  | 9.37                        |
